# Supplementary material for: Predictive Value of the Neutrophil-to-Lymphocyte Ratio for 28-Day Mortality in Elderly Patients with Sepsis: A Cohort Study Based on the MIMIC-IV Database
Source: Research Square preprint supplement (doi:10.21203/rs.3.rs-7066034/v1), 2025-08-07
Supplement: Supplementary file 1 [file a9a5be81205859888c5d6446.docx]

TABLE 1 Baseline characteristics of the study population according to Neutrophil-to-Lymphocyte Ratio

| **Variables** | **Total (n = 7522)** | **Neutrophil-to-Lymphocyte Ratio level** | | | | **P value** |
| --- | --- | --- | --- | --- | --- | --- |
| **<4.9** | **4.9-8.8** | **8.8-16.0** | **＞16.0** |
| **Quintile1**  **(n = 1872)** | **Quintile2**  **(n = 1879)** | **Quintile3**  **(n = 1885)** | **Quintile4**  **(n = 1886)** |
| NLR | 8.9 (5.0, 16.1) | 3.3 (2.5, 4.1) | 6.7 (5.8, 7.7) | 11.7 (10.1, 13.6) | 25.0 (19.4, 36.1) | < 0.001 |
| Age (years) | 78.0 ± 8.1 | 77.4 ± 8.0 | 77.4 ± 7.9 | 78.5 ± 8.3 | 78.7 ± 8.2 | < 0.001 |
| Sex Male (n, %) |  |  |  |  |  | 0.503 |
| Female | 3377 (44.9) | 858 (45.8) | 819 (43.6) | 841 (44.6) | 859 (45.5) |  |
| Male | 4145 (55.1) | 1014 (54.2) | 1060 (56.4) | 1044 (55.4) | 1027 (54.5) |  |
| Race(n, %) |  |  |  |  |  | < 0.001 |
| White | 5073 (67.4) | 1211 (64.7) | 1290 (68.7) | 1251 (66.4) | 1321 (70) |  |
| Black | 571 ( 7.6) | 203 (10.8) | 144 (7.7) | 143 (7.6) | 81 (4.3) |  |
| Others | 1878 (25.0) | 458 (24.5) | 445 (23.7) | 491 (26) | 484 (25.7) |  |
| BMI (kg/m2) | 28.3 ± 7.1 | 28.1 ± 6.4 | 28.6 ± 7.2 | 28.2 ± 7.2 | 28.1 ± 7.7 | 0.064 |
| SBP (mmHg) | 116.1 ± 15.0 | 116.6 ± 13.9 | 116.6 ± 14.9 | 116.9 ± 16.2 | 114.3 ± 14.7 | < 0.001 |
| DBP (mmHg) | 59.5 ± 9.7 | 59.0 ± 9.5 | 59.4 ± 9.4 | 59.6 ± 10.2 | 59.7 ± 9.8 | 0.125 |
| RR (beats/min) | 19.8 ± 3.9 | 18.8 ± 3.6 | 19.4 ± 3.6 | 20.2 ± 4.0 | 20.9 ± 4.0 | < 0.001 |
| HR (beats/min) | 83.9 ± 15.6 | 80.9 ± 14.1 | 83.1 ± 14.5 | 84.0 ± 16.0 | 87.6 ± 16.9 | < 0.001 |
| Temperature (◦C) | 36.8 ± 0.6 | 36.7 ± 0.5 | 36.8 ± 0.5 | 36.8 ± 0.6 | 36.8 ± 0.6 | < 0.001 |
| Spo2(%) | 96.9 ± 2.2 | 97.3 ± 2.0 | 97.1 ± 2.0 | 96.8 ± 2.3 | 96.5 ± 2.2 | < 0.001 |
| WBC(×109/L) | 15.9 ± 8.3 | 12.5 ± 5.8 | 14.4 ± 6.7 | 16.0 ± 7.2 | 20.6 ± 10.5 | < 0.001 |
| Hemoglobin(g/dL) | 9.9 ± 2.1 | 9.6 ± 2.0 | 9.8 ± 2.1 | 10.0 ± 2.2 | 10.2 ± 2.2 | < 0.001 |
| Platelets(×109/L) | 202.5 ± 103.1 | 177.8 ± 80.6 | 197.5 ± 92.8 | 215.3 ± 107.4 | 219.1 ± 121.7 | < 0.001 |
| ALT (U/L) | 26.0 (16.0, 55.8) | 24.0 (15.0, 46.0) | 24.0 (15.0, 47.0) | 27.0 (16.0, 65.0) | 30.0 (17.0, 77.0) | < 0.001 |
| INR | 1.4 (1.2, 1.7) | 1.4 (1.2, 1.6) | 1.4 (1.2, 1.7) | 1.4 (1.2, 1.7) | 1.4 (1.2, 1.9) | < 0.001 |
| Creatinine (mg/dL) | 1.3 (0.9, 2.0) | 1.1 (0.8, 1.6) | 1.2 (0.9, 1.8) | 1.4 (0.9, 2.2) | 1.5 (1.0, 2.4) | < 0.001 |
| BUN (mg/dL) | 27.0 (18.0, 44.0) | 21.0 (15.0, 32.0) | 25.0 (17.0, 41.0) | 30.0 (20.0, 48.0) | 34.0 (22.0, 54.0) | < 0.001 |
| Lactate (mmol/L) | 2.1 (1.4, 3.3) | 2.3 (1.6, 3.4) | 2.1 (1.4, 3.2) | 2.0 (1.4, 3.3) | 2.1 (1.4, 3.3) | < 0.001 |
| PH | 7.3 ± 0.1 | 7.3 ± 0.1 | 7.3 ± 0.1 | 7.3 ± 0.1 | 7.3 ± 0.1 | 0.013 |
| Glucose (mg/dl) | 134.8 (117.2, 165.7) | 129.5 (117.0, 151.8) | 133.3 (118.0, 157.3) | 140.3 (117.8, 175.0) | 140.4 (115.8, 176.8) | < 0.001 |
| Sodium (mmol/l) | 140.5 ± 5.6 | 140.6 ± 5.0 | 140.6 ± 5.7 | 140.6 ± 5.9 | 140.2 ± 5.7 | 0.152 |
| Potassium (mmol/l) | 4.7 ± 0.9 | 4.7 ± 0.9 | 4.7 ± 0.9 | 4.8 ± 0.9 | 4.8 ± 0.9 | 0.026 |
| Calcium (mg/dl) | 8.0 ± 0.9 | 8.1 ± 0.8 | 8.1 ± 0.8 | 8.0 ± 0.9 | 7.9 ± 0.8 | < 0.001 |
| Lymphocytes (×109/L) | 6.0 (1.1, 108.0) | 5.6 (2.0, 178.2) | 56.4 (1.4, 134.6) | 40.9 (1.0, 96.8) | 1.1 (0.5, 54.6) | < 0.001 |
| Neutrophils (×109/L) | 39.8 (9.8, 967.1) | 14.7 (6.3, 568.2) | 396.2 (9.2, 914.4) | 517.1 (11.4, 1126.7) | 28.4 (14.2, 1402.7) | < 0.001 |
| CHF | 3031 (40.3) | 625 (33.4) | 738 (39.3) | 824 (43.7) | 844 (44.8) | < 0.001 |
| CVD | 1407 (18.7) | 370 (19.8) | 382 (20.3) | 370 (19.6) | 285 (15.1) | < 0.001 |
| COPD | 2204 (29.3) | 478 (25.5) | 532 (28.3) | 549 (29.1) | 645 (34.2) | < 0.001 |
| MI | 1777 (23.6) | 407 (21.7) | 424 (22.6) | 484 (25.7) | 462 (24.5) | 0.018 |
| Liver disease | 258 ( 3.4) | 62 (3.3) | 60 (3.2) | 58 (3.1) | 78 (4.1) | 0.268 |
| Renal disease | 2196 (29.2) | 459 (24.5) | 540 (28.7) | 587 (31.1) | 610 (32.3) | < 0.001 |
| Diabetes | 2754 (36.6) | 673 (36) | 704 (37.5) | 713 (37.8) | 664 (35.2) | 0.29 |
| SAPS II | 43.9 ± 12.8 | 41.0 ± 12.3 | 42.3 ± 12.0 | 44.8 ± 12.8 | 47.4 ± 12.9 | < 0.001 |
| SOFA | 3.7 ± 1.9 | 3.5 ± 1.9 | 3.6 ± 1.9 | 3.6 ± 2.0 | 3.8 ± 2.0 | < 0.001 |
| MV | 4107 (54.6) | 1065 (56.9) | 1061 (56.5) | 1030 (54.6) | 951 (50.4) | < 0.001 |
| RRT | 705 ( 9.4) | 116 (6.2) | 164 (8.7) | 196 (10.4) | 229 (12.1) | < 0.001 |
| Vasopressor use | 3899 (51.8) | 1037 (55.4) | 1001 (53.3) | 904 (48) | 957 (50.7) | < 0.001 |
| LOS hospital, day | 9.0 (5.0, 15.0) | 8.0 (5.0, 12.0) | 9.0 (5.0, 15.0) | 9.0 (6.0, 15.0) | 9.0 (6.0, 16.0) | < 0.001 |
| LOS ICU, day | 3.0 (2.0, 7.0) | 3.0 (2.0, 5.0) | 3.0 (2.0, 7.0) | 4.0 (2.0, 7.0) | 4.0 (2.0, 7.0) | < 0.001 |
| 28 days mortality, n (%) | 1706 (22.7) | 281 (15) | 343 (18.3) | 481 (25.5) | 601 (31.9) | < 0.001 |

**Abbreviations:** NLR, Neutrophil-to-Lymphocyte Ratio; BMI, Body Mass Index; SBP, systolic blood pressure; DBP, diastolic blood pressure; RR, respiratory rate; HR, heart rate; Spo2, Peripheral Capillary Oxygen Saturation; WBC, white blood cells; PLT, platelet; ALT, alanine transaminase; INR, international normalized ratio; BUN, blood urea nitrogen; PH, Potential of Hydrogen; CHF, congestive heart failure; CVD, cerebrovascular disease; COPD, chronic obstructive pulmonary disease; MI, myocardial infarction; SAPS II, simplified acute physiology score II; SOFA, sequential organ failure assessment; MV, mechanical ventilation; RRT, renal replacement therapy; LOS, length of stay

|  |
| --- |
