# Supplementary material for: Predictive Value of the Neutrophil-to-Lymphocyte Ratio for 28-Day Mortality in Elderly Patients with Sepsis: A Cohort Study Based on the MIMIC-IV Database
Source: Research Square preprint supplement (doi:10.21203/rs.3.rs-7066034/v1), 2025-08-07
Supplement: Supplementary file 2 [file cac9385314d303d93633a1bc.docx]

TABLE 2 Multivariate Cox regression for Neutrophil-to-Lymphocyte Ratio on all-cause mortality of the elderly patients with sepsis

| **Variable** | **Model1** | | **Model2** | | **Model3** | |
| --- | --- | --- | --- | --- | --- | --- |
| **HR (95% CI)** | **P value** | **HR (95% CI)** | **P value** | **HR (95% CI)** | **P value** |
| Continuous variable |  |  |  |  |  |  |
| NLR.z | 1.16 (1.13~1.19) | <0.001 | 1.14 (1.11~1.18) | <0.001 | 1.06 (1.01~1.1) | 0.009 |
| Binary variable |  |  |  |  |  |  |
| Quintile 1（<4.9） | 1(Ref) |  | 1(Ref) |  | 1(Ref) |  |
| Quintile 2（4.9-8.8） | 1.23 (1.05~1.44) | 0.009 | 1.24 (1.06~1.45) | 0.008 | 1.12 (0.95~1.32) | 0.172 |
| Quintile 3（8.8-16.0） | 1.81 (1.56~2.1) | <0.001 | 1.75 (1.51~2.03) | <0.001 | 1.32 (1.12~1.55) | 0.001 |
| Quintile 4（＞16.0） | 2.34 (2.03~2.7) | <0.001 | 2.24 (1.94~2.58) | <0.001 | 1.47 (1.23~1.75) | <0.001 |
| Trend.test |  | <0.001 |  | <0.001 |  | <0.001 |

**Notes:** Model 1: Non-adjusted model. Model 2: Adjust for age and gender. Model 3: Model 2 + Race, BMI , SBP, DBP, RR , HR, Temperature , Spo2, WBC, Hemoglobin, Platelets, ALT, INR, Creatinine, BUN , Lactate , PH, Glucose, Sodium , Potassium, Calcium , Lymphocytes, Neutrophils, CHF, CVD, COPD, MI, Liver disease, Renal disease, Diabetes, SAPS II, SOFA, MV, RRT, Vasopressor use

**Abbreviations:** NLR.z :Z-standardized value of the Neutrophil-to-Lymphocyte Ratio (NLR).NLR, Neutrophil-to-Lymphocyte Ratio; BMI, Body Mass Index; SBP, systolic blood pressure; DBP, diastolic blood pressure; RR, respiratory rate; HR, heart rate; Spo2, Peripheral Capillary Oxygen Saturation; WBC, white blood cells; PLT, platelet; ALT, alanine transaminase; INR, international normalized ratio; BUN, blood urea nitrogen; PH, Potential of Hydrogen; CHF, congestive heart failure; CVD, cerebrovascular disease; COPD, chronic obstructive pulmonary disease; MI, myocardial infarction; SAPS II, simplified acute physiology score II; SOFA, sequential organ failure assessment; MV, mechanical ventilation; RRT, renal replacement therapy
